# Supplementary material for: PER2 Circadian Oscillation Sensitizes Esophageal Cancer Cells to Chemotherapy
Source: PubMed Central journal article supplement (PMC8065910; doi:10.3390/biology10040266), 2021-03-26
Supplement: biology-10-00266-s001.pdf [file biology-10-00266-s001.pdf]

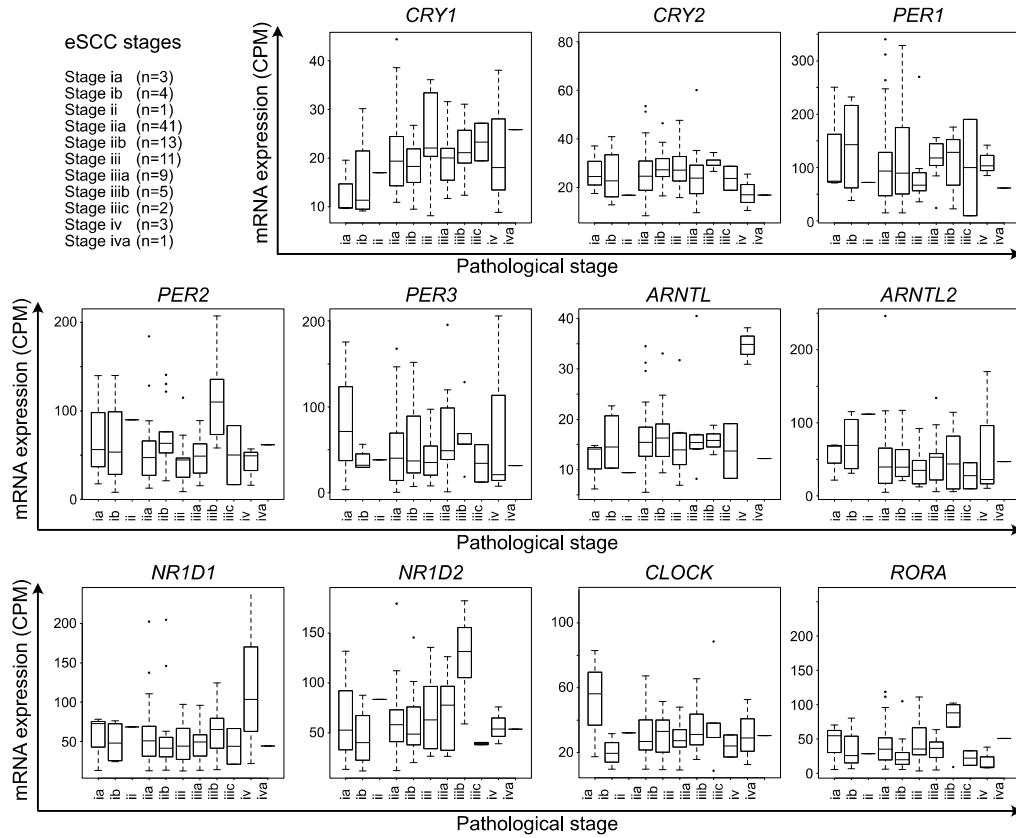

**Supplementary figure 1. Expression of clock-related genes in human eSCC samples depending on tumor stages**

Expression of *CRY1*, *CRY2*, *PER1*, *PER2*, *PER3*, *ARNTL*, *ARNTL2*, *NR1D1*, *NR1D2*, *CLOCK* and *RORA* transcripts measured by RNA sequencing in human eSCC biopsies at different stages of tumor progression. Data are represented as box plots.

## Supplementary Figure1

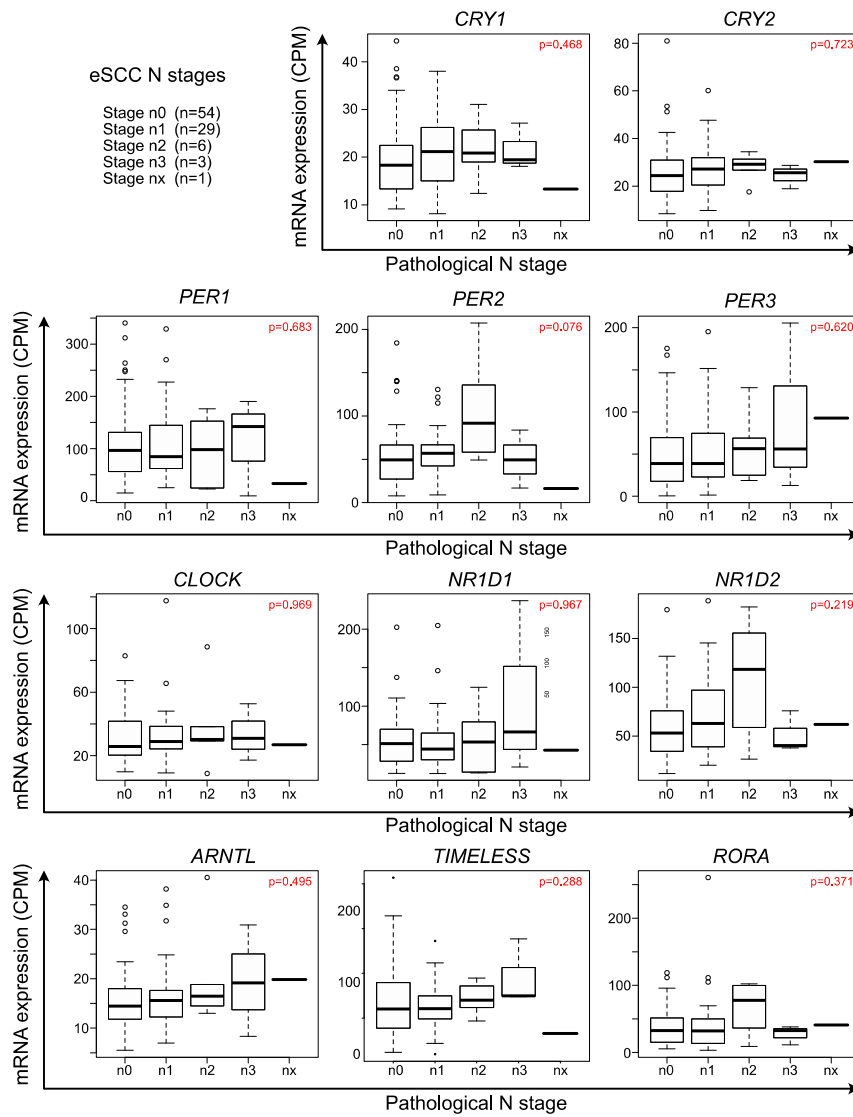

**Supplementary figure 2. Expression of clock-related genes in human eSCC samples regarding N tumor pathological stage**

Expression of *CRY1*, *CRY2*, *PER1*, *PER2*, *PER3*, *ARNTL*, *TIMELESS*, *NR1D1*, *NR1D2*, *CLOCK* and *RORA* transcripts measured by RNA sequencing in human eSCC biopsies at different pathological N stages (lymph node invasion categories). Data are represented as box plots.

## Supplementary Figure2

Whole Gel - HSP90

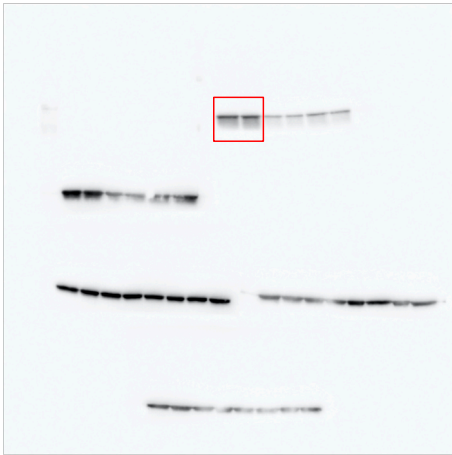

Size marker

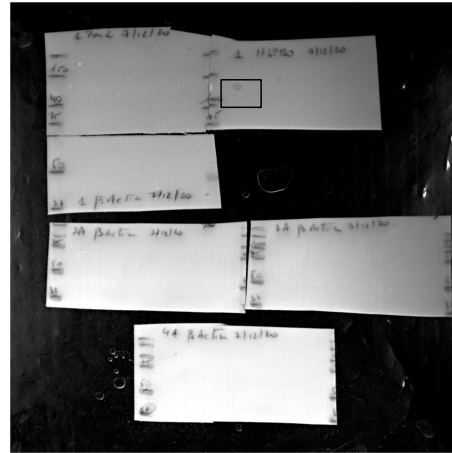

Whole Gel - PER2

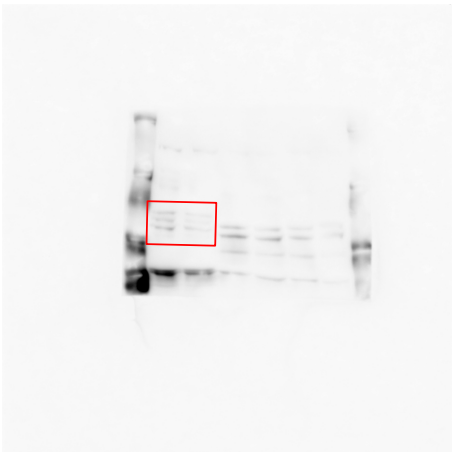

Size marker

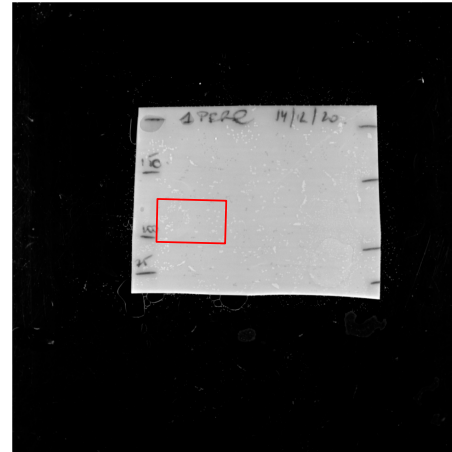

| WB         | Condition | Image Name  | Channel | Name  | Signal     | Total      | Area  | Bkgnd.  | Type   |
|------------|-----------|-------------|---------|-------|------------|------------|-------|---------|--------|
| Per2       | 24h       | 20201215_XI | W       | 00002 | 154876,969 | 438078,844 | 15180 | 18,6563 | Signal |
| Per2       | 36h       | 20201215_XI | W       | 00001 | 54874,2813 | 267394,281 | 15180 | 14      | Signal |
| HSP90      | 24h       | 20201208_XI | W       | 00001 | 127348     | 144448     | 2850  | 6       | Signal |
| HSP90      | 36h       | 20201208_XI | W       | 00003 | 120844     | 137944     | 2850  | 6       | Signal |
| Normalized | Condition |             |         |       |            |            |       |         |        |
| Per/2HSP90 | 24h       | 1,21617119  |         |       |            |            |       |         |        |
| Per/2HSP90 | 36h       | 0,4540919   |         |       |            |            |       |         |        |

## Appendix 1

Whole gel -  $\gamma$ H2AX

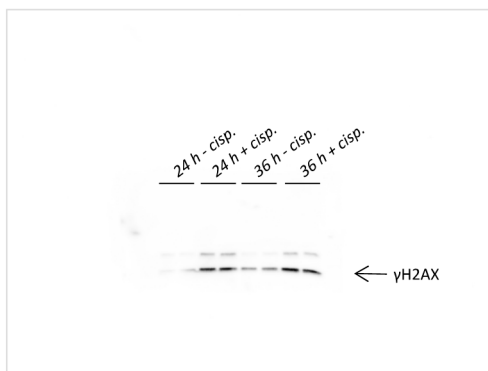

Size marker

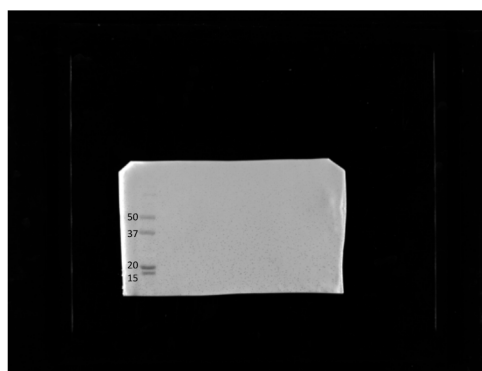

Whole gel -  $\gamma$ H2AX +  $\beta$ -actin

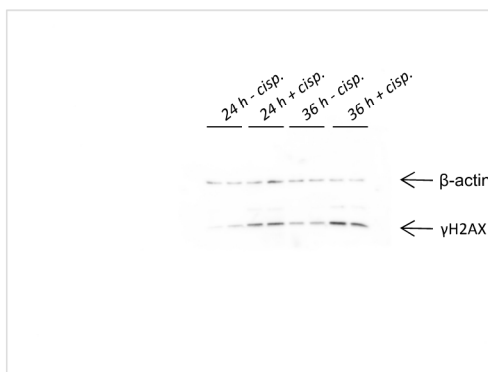

Size marker

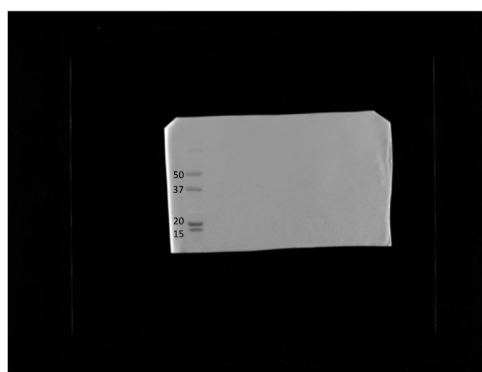

| Condition                         | $\gamma$ H2AX area | $\beta$ -Actin area | Normalized $\gamma$ H2AX/actin |
|-----------------------------------|--------------------|---------------------|--------------------------------|
| 24 of sync. Sample 1              | 374,213            | 1817,012            | 0,206                          |
| 24 of sync. Sample 2              | 1541,598           | 1401,477            | 1,100                          |
| 24 of sync. + cisplatin. Sample 1 | 4630,74            | 2344,669            | 1,975                          |
| 24 of sync. + cisplatin. Sample 2 | 5767,326           | 4481,447            | 1,287                          |
| 36 of sync. Sample 1              | 2129,719           | 2236,841            | 0,952                          |
| 36 of sync. Sample 2              | 2326,841           | 1744,305            | 1,334                          |
| 36 of sync. + cisplatin. Sample 1 | 8459,64            | 1322,891            | 6,395                          |
| 36 of sync. + cisplatin. Sample 2 | 6219,811           | 1076,062            | 5,780                          |
